# Supplementary material
Source: PubMed Central journal article supplement (PMC8078034)
Supplement: mmc1.pdf [file mmc1.pdf]

# A SERO-SURVILLANCE STUDY FOR COVID-19 DISEASE IN HEALTH CARE WORKERS

\* Required

## 1. Identifier and risk assessment information

1. 1.1 Full Name \*

---

2. 1.2 Staff number \*

---

3. 2.Sex \*

*Mark only one oval.*

Male

Female

4. 3.Date of Birth \*

---

*Example: January 7, 2019*

5. 4.Mobile number \*

---

## 6. 5.Governorate \*

*Mark only one oval.*

- Muscat
- Dhofar
- Dakhliyah
- Al Dhahirah
- North Batinah
- South Batinah
- North Sharqiyah
- South Sharqiyah
- Musandm
- Al Buraimi
- Al Wusta

## 7. 6.Wilayt of residency \*

---

## 8. 7.Nationality \*

---

## 9. 8.Hospital \*

---

## 10. 9.Occupation in health care facility \*

*Mark only one oval.*

- Medical doctor
- Nurse
- Lab Technician
- Radiology/x-ray technician
- Phlebotomist
- Nutritionist/dietician
- pharmacist
- medical orderly
- Cleaner
- Administration
- medical engineer
- IT personal
- Others

## 11. 10.Residence/accommodation place \*

*Mark only one oval.*

- Hospital campus
- Renting with friends
- Company residential complex
- Family house

## 12. 11.Number of people living in the same accommodation \*

---

13. 12.Number of people sharing room \*

---

14. 13.Have you recently had Infection prevention & control (IPC) training ? \*

*Mark only one oval.*

- Yes
- Forgotten/not sure
- I never had IPC training

15. 14.If Yes to Q13,What was the date of your most recent IPC training within the health care facility?

---

*Example: January 7, 2019*

16. 15.Are you a healthcare worker specifically dedicated to caring for COVID-19 patients? \*

*Mark only one oval.*

- YES
- NO
- There are no COVID-19 dedicated staff in my facility

17. 16. Have you had contact with anyone with probable or confirmed COVID-19 virus infection? \*

*Mark only one oval.*

- YES  
 NO  
 UNKNOWN

18. 17. If yes to Q16, the person was

*Mark only one oval.*

- Patient  
 Co-worker  
 Friend  
 Family member

19. 18. If Yes to Q16, dates of last contact

---

*Example: January 7, 2019*

20. 19. If yes to Q16, did you wear PPE?

*Mark only one oval.*

- YES  
 NO  
 UNKNOWN

21. 20.If yes to Q19, what type? (list is multiple choice)

*Check all that apply.*

- Medical/surgical mask
- Face shield
- Gloves
- Goggles/glasses
- Gown
- Coverall
- Head cover
- Respirator (e.g. N95, FFP2 or equivalent)
- Shoe covers

22. 21.If you were wearing a respirator (N95), was it test fitted?

*Mark only one oval.*

- YES
- NO
- UNKNOWN
- Not applicable

23. 22.If you were wearing gloves, did you remove them after contact with the patient?

\*

*Mark only one oval.*

- YES
- NO
- UNKNOWN
- Not applicable

24. 23. Were you present for any aerosolizing procedures performed on suspected/confirmed COVID-19 patient? \*

*Mark only one oval.*

- YES
- NO
- UNKNOWN
- Not applicable

25. 24. If yes to Q23, describe the procedure

---

---

---

---

---

26. 25. If yes to Q23, did you wear PPE?

*Mark only one oval.*

- YES
- NO
- UNKNOWN

27. 26.If yes to Q25, what type?

*Check all that apply.*

- Medical/surgical mask
- Face shield
- Gloves
- Goggles/glasses
- Gown
- Coverall
- Head cover
- Respirator (e.g. N95, FFP2 or equivalent)
- Shoe covers

28. 27.If yes to Q23, was procedure performed in an airborne setting?

*Mark only one oval.*

- Yes
- No
- UNKNOWN

## 2. Disease / Symptom history

29. 1.Have you been confirmed to have COVID-19 before \*

*Mark only one oval.*

- Yes
- No

30. 1.1 If yes , when was your test positive ?

---

*Example: January 7, 2019*



31. 1.2 If yes to Q1, Have you had radiological evidence of pneumonia (e.g. by chest X-ray or computed tomography scan) since diagnose?

*Mark only one oval.*

- Yes  
 No  
 UNKNOWN

32. 1.3 If yes to Q1, did you require admission?

*Mark only one oval.*

- Yes  
 No

33. 1.4 If Yes, did you need ICU care?

*Mark only one oval.*

- Yes  
 No

34. 1.5 How long admission?

---

35. 1.6 Outcome? (Full recovery or with Sequel)

---

---

---

---

---

## 36. 2. Do you recall any of the following symptoms in the past 4-12 weeks? \*

Mark only one oval per row.

|                                 | YES                   | NO                    | UNKNOWN               |
|---------------------------------|-----------------------|-----------------------|-----------------------|
| Fever $\geq 38^{\circ}\text{C}$ | <input type="radio"/> | <input type="radio"/> | <input type="radio"/> |
| Fatigue                         | <input type="radio"/> | <input type="radio"/> | <input type="radio"/> |
| Muscle ache (myalgia)           | <input type="radio"/> | <input type="radio"/> | <input type="radio"/> |
| Sore throat                     | <input type="radio"/> | <input type="radio"/> | <input type="radio"/> |
| Cough                           | <input type="radio"/> | <input type="radio"/> | <input type="radio"/> |
| Runny nose (rhinorea)           | <input type="radio"/> | <input type="radio"/> | <input type="radio"/> |
| Shortness of breath (dyspnea)   | <input type="radio"/> | <input type="radio"/> | <input type="radio"/> |
| Wheezing                        | <input type="radio"/> | <input type="radio"/> | <input type="radio"/> |
| Chest pain                      | <input type="radio"/> | <input type="radio"/> | <input type="radio"/> |
| Other respiratory symptoms      | <input type="radio"/> | <input type="radio"/> | <input type="radio"/> |
| Headache                        | <input type="radio"/> | <input type="radio"/> | <input type="radio"/> |
| Nausea/vomiting                 | <input type="radio"/> | <input type="radio"/> | <input type="radio"/> |
| Abdominal pain                  | <input type="radio"/> | <input type="radio"/> | <input type="radio"/> |
| Diarrhea                        | <input type="radio"/> | <input type="radio"/> | <input type="radio"/> |

37. 3. Do you have any underlying disease or pre-existing condition(s)? (list is multiple choice) \*

*Check all that apply.*

- Pregnancy
- Obesity
- Cancer
- Diabetes
- Hypertension
- HIV/other immune deficiency
- Heart disease
- Asthma (requiring medication)
- Chronic lung disease (non-asthma)
- Chronic liver disease
- Chronic haematological disorder
- Chronic kidney disease
- Chronic neurological
- Organ/bone marrow recipient
- NO
- UNKNOWN

Other:  \_\_\_\_\_

38. 4. Are you taking any medication(s) regularly? (list is multiple choice) \*

*Check all that apply.*

- Statin medication
- ACE inhibitors
- Anti-acid
- Proton pump inhibitors (Omeprazole)
- Steroid medication
- Antidiabetic medication
- Immunosuppressive medication
- No
- Unknown

Other:  \_\_\_\_\_

This content is neither created nor endorsed by Google.

Google Forms
